# Supplementary material for: How and When May Technostress Impact Workers’ Psycho-Physical Health and Work-Family Interface? A Study during the COVID-19 Pandemic in Italy
Source: MDPI journal article supplement (doi:10.3390/ijerph20021266), 2023-01-10
Supplement: s1 [file s1]

**Supplemental Table S1.** Independent t-test analyses among groups differing in work mode (in presence vs. remote working) and gender with reference to the study's variables.

|                  | On worksite |      | Remote working |      | t     | p    | 95% IC |      | Cohen's <i>d</i> |
|------------------|-------------|------|----------------|------|-------|------|--------|------|------------------|
|                  | (n=151)     |      | (n=115)        |      |       |      | LI     | LS   |                  |
|                  | M           | DS   | M              | DS   |       |      |        |      |                  |
| Techno distress  | 2.11        | .88  | 2.57           | .86  | -4.23 | .000 | -.67   | -.24 | .53              |
| Fear of COVID    | 2.04        | .94  | 2.41           | 1.08 | -2.95 | .003 | -.61   | -.12 | .36              |
| Work excessively | 2.81        | .75  | 2.88           | .66  | -.82  | .41  | -.24   | .10  | -                |
| GHQ              | 1.08        | .65  | 1.22           | .69  | -1.66 | .099 | -.30   | .03  | -                |
| WFC              | 3.36        | 1.67 | 3.66           | 1.51 | -1.51 | .132 | -.69   | .09  | -                |
| Resilience       | 2.95        | .52  | 2.90           | .54  | .74   | .459 | -.08   | .18  | -                |

  

|                  | Male   |      | Female  |      | t     | p    | 95% CI |      | Cohen's <i>d</i> |
|------------------|--------|------|---------|------|-------|------|--------|------|------------------|
|                  | (n=99) |      | (n=166) |      |       |      | LI     | LS   |                  |
|                  | M      | DS   | M       | DS   |       |      |        |      |                  |
| Techno distress  | 2.25   | .87  | 2.34    | .92  | -.81  | .420 | -.32   | .13  | -                |
| Fear of COVID    | 1.89   | .91  | 2.38    | 1.04 | -3.89 | .000 | -.74   | -.24 | .50              |
| Work excessively | 2.71   | .77  | 2.92    | .66  | -2.42 | .016 | -.39   | -.04 | .29              |
| GHQ              | .95    | .62  | 1.25    | .68  | -3.54 | .000 | -.46   | -.13 | .46              |
| WFC              | 3.23   | 1.48 | 3.64    | 1.66 | -2.03 | .044 | -.81   | .01  | .26              |
| Resilience       | 3.08   | .49  | 2.85    | .54  | 3.44  | .001 | .10    | .35  | .45              |

**Supplemental Table S2.** Independent t-test analyses among groups differing in COVID-19-related experience variables with reference to the study's variables.

|                  | No COVID (n=242) |      | COVID positivity<br>(n=24) |      | t     | p    | 95% CI |      | Cohen's <i>d</i> |
|------------------|------------------|------|----------------------------|------|-------|------|--------|------|------------------|
|                  | M                | DS   | M                          | DS   |       |      | LI     | LS   |                  |
|                  |                  |      |                            |      |       |      |        |      |                  |
| Techno distress  | 2.28             | .86  | 2.52                       | 1.23 | -1.25 | .210 | -.63   | .14  | -                |
| Fear of COVID    | 2.20             | .99  | 2.23                       | 1.26 | -.13  | .895 | -.46   | .40  | -                |
| Work excessively | 2.84             | .70  | 2.86                       | .87  | -.14  | .888 | -.32   | .28  | -                |
| GHQ              | 1.13             | .65  | 1.19                       | .89  | -.35  | .725 | -.33   | .23  | -                |
| WFC              | 3.43             | 1.57 | 4.17                       | 1.85 | -2.17 | .031 | -.91   | -.07 | .43              |
| Resilience       | 2.91             | .52  | 3.12                       | .59  | -1.87 | .063 | -.43   | .01  | -                |

|                  | No loss<br>(n=229) |      | Loss of loved ones<br>(n=36) |      | t     | p    | 95% CI |      | Cohen's <i>d</i> |
|------------------|--------------------|------|------------------------------|------|-------|------|--------|------|------------------|
|                  | M                  | DS   | M                            | DS   |       |      | LI     | LS   |                  |
|                  |                    |      |                              |      |       |      |        |      |                  |
| Techno distress  | 2.28               | .87  | 2.43                         | 1.08 | -.93  | .354 | -.09   | .25  | -                |
| Fear of COVID    | 2.09               | .92  | 2.88                         | 1.33 | -4.44 | .000 | -.78   | .18  | .69              |
| Work excessively | 2.82               | .70  | 2.98                         | .78  | -1.26 | .207 | -.41   | .09  | -                |
| GHQ              | 1.12               | .65  | 1.25                         | .78  | -1.03 | .306 | -.36   | .11  | -                |
| WFC              | 3.39               | 1.56 | 4.11                         | 1.78 | -2.53 | .012 | -.98   | -.16 | .43              |
| Resilience       | 2.91               | .54  | 3.06                         | .43  | -1.62 | .106 | -.34   | .03  | -                |

|                  | No positive<br>coworkers<br>(n=142) |      | Positive coworkers<br>(n=123) |      | t     | p    | 95% CI |      | Cohen's <i>d</i> |
|------------------|-------------------------------------|------|-------------------------------|------|-------|------|--------|------|------------------|
|                  | M                                   | DS   | M                             | DS   |       |      | LI     | LS   |                  |
|                  |                                     |      |                               |      |       |      |        |      |                  |
| Techno distress  | 2.19                                | .84  | 2.44                          | .96  | -2.27 | .024 | -.47   | -.03 | .28              |
| Fear of COVID    | 2.13                                | .84  | 2.29                          | 1.20 | -1.25 | .213 | -.40   | .09  | -                |
| Work excessively | 2.88                                | .69  | 2.79                          | .74  | .91   | .364 | -.09   | .25  | -                |
| GHQ              | 1.10                                | .63  | 1.19                          | .72  | -1.10 | .272 | -.25   | .07  | -                |
| WFC              | 3.39                                | 1.55 | 3.61                          | 1.68 | -1.14 | .256 | -.62   | .16  | -                |
| Resilience       | 2.92                                | .55  | 2.94                          | .51  | -.23  | .815 | -.14   | .11  | -                |

**Supplemental Table S3.** ANOVAs across age groups with reference to the study's variables.

| Variable         | Age             | <i>M</i> | <i>SD</i> | <i>F</i> | 95% <i>CI</i> |           |
|------------------|-----------------|----------|-----------|----------|---------------|-----------|
|                  |                 |          |           |          | <i>LL</i>     | <i>UL</i> |
| Techno distress  | <30 years old   | 1.90     | .73       | 9.46***  | 1.75          | 2.06      |
|                  | 31-40 years old | 2.37     | .98       |          | 2.14          | 2.60      |
|                  | 41-50 years old | 2.44     | .94       |          | 2.14          | 2.75      |
|                  | >50 years old   | 2.59     | .78       |          | 2.40          | 2.77      |
| Fear of COVID    | <30 years old   | 1.95     | .96       | 5.58**   | 1.74          | 2.15      |
|                  | 31-40 years old | 2.21     | 1.07      |          | 1.96          | 2.46      |
|                  | 41-50 years old | 2.09     | .88       |          | 1.80          | 2.37      |
|                  | >50 years old   | 2.61     | 1.02      |          | 2.35          | 2.86      |
| Work excessively | <30 years old   | 2.75     | .67       | 3.04*    | 2.61          | 2.89      |
|                  | 31-40 years old | 3.03     | .77       |          | 2.85          | 3.21      |
|                  | 41-50 years old | 2.88     | .76       |          | 2.63          | 3.12      |
|                  | >50 years old   | 2.71     | .61       |          | 2.56          | 2.86      |
| GHQ              | <30 years old   | 1.15     | .68       | 2.85*    | 1.00          | 1.29      |
|                  | 31-40 years old | 1.31     | .75       |          | 1.13          | 1.49      |
|                  | 41-50 years old | .94      | .58       |          | .75           | 1.13      |
|                  | >50 years old   | 1.09     | .58       |          | .94           | 1.23      |
| WFC              | <30 years old   | 3.17     | 1.62      | 2.40     | 2.82          | 2.82      |
|                  | 31-40 years old | 3.77     | 1.87      |          | 3.33          | 3.35      |
|                  | 41-50 years old | 3.23     | 1.36      |          | 2.79          | 2.79      |
|                  | >50 years old   | 3.61     | 1.27      |          | 3.30          | 3.30      |
| Resilience       | <30 years old   | 2.88     | .50       | .14      | 2.77          | 2.30      |
|                  | 31-40 years old | 2.94     | .59       |          | 2.80          | 3.08      |
|                  | 41-50 years old | 2.88     | .51       |          | 2.71          | 3.05      |
|                  | >50 years old   | 2.98     | .49       |          | 2.85          | 3.10      |

Note. *M*= mean; *DS*= standard deviation; 95% *CI*= 95% confidence intervals; *LL*=lower limit; *UL*=upper limit.
